# Supplementary material for: Heterogenous Differences in Cellular Senescent Phenotypes in Pre-Eclampsia and IUGR following Quantitative Assessment of Multiple Biomarkers of Senescence
Source: MDPI journal article supplement (doi:10.3390/ijms24043101), 2023-02-04
Supplement: s1 [file s1]

*Expression of senescence associated genes in Adverse pregnancy outcomes*

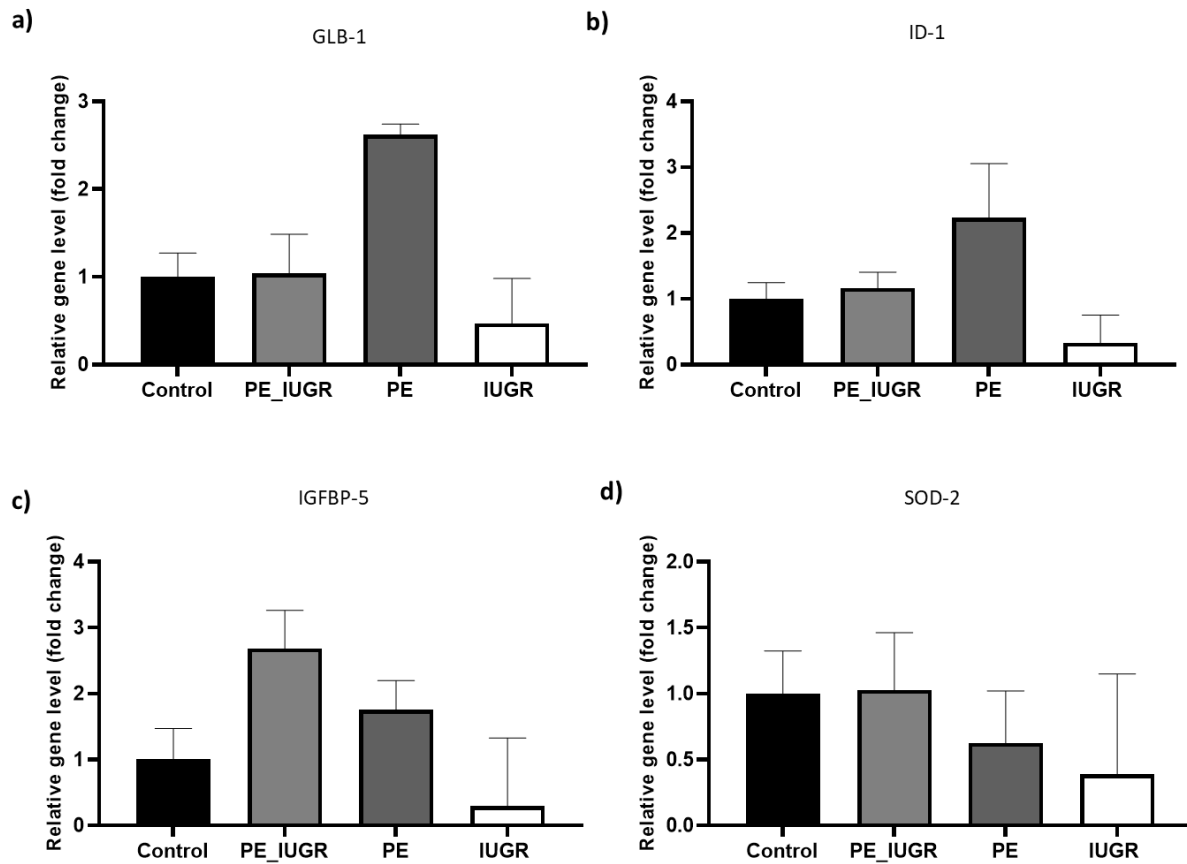

**Supplementary Figure S1.** Expression of senescence associated gene for (a) GLB-1, (b) ID-1, IGFBP-5 (c) and SOD-2 (d) showed no statistical differences when compared to controls.

Expression of nuclear intermediate filament protein Lamin B1 in placental tissue in Pre-eclampsia and IUGR

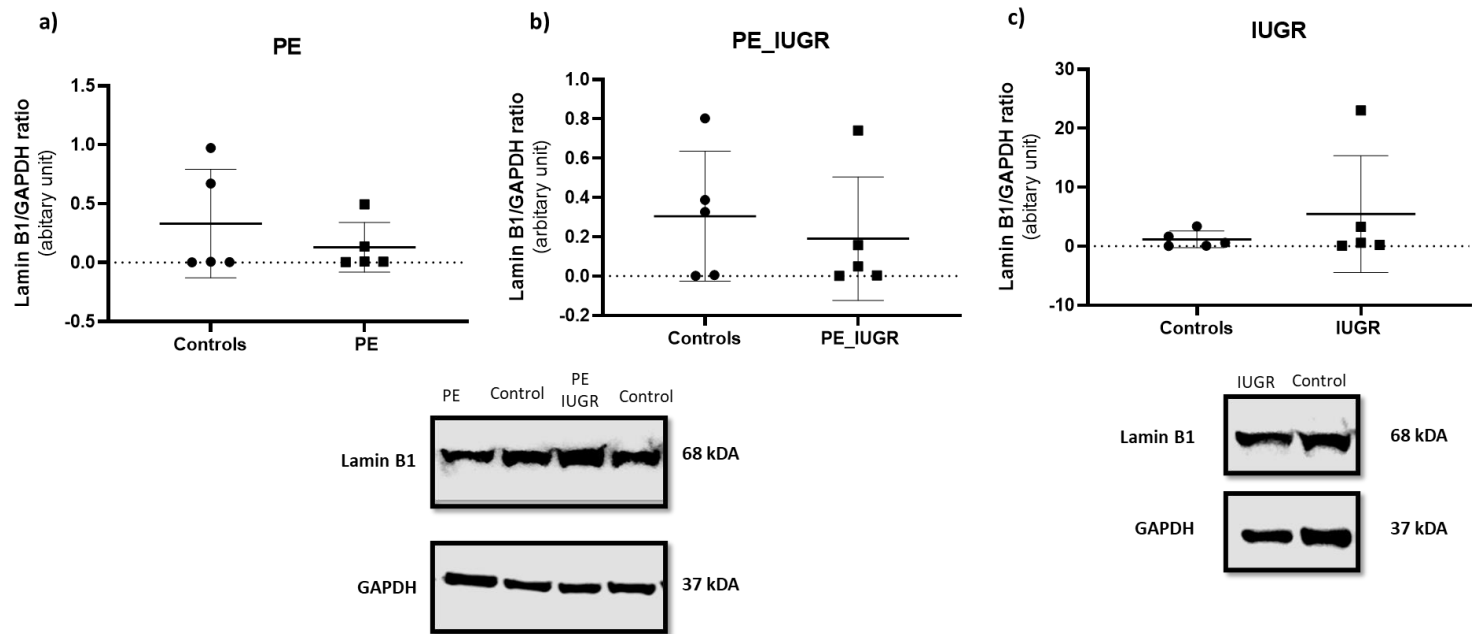

**Supplementary Figure S2.** Lamin B1 protein expression in placental tissue for (a) PE only, n=5 (b) PE associated with IUGR, n=5 (c) IUGR <10<sup>th</sup> Centile, n=5. Statistical Analysis with Wilcoxon matched-pairs signed rank test with two-tailed test, v control placenta. Protein expression of Lamin B1 was normalized to the expression of the housekeeping reference protein GAPDH.

Absolute Quantification for mitochondrial DNA

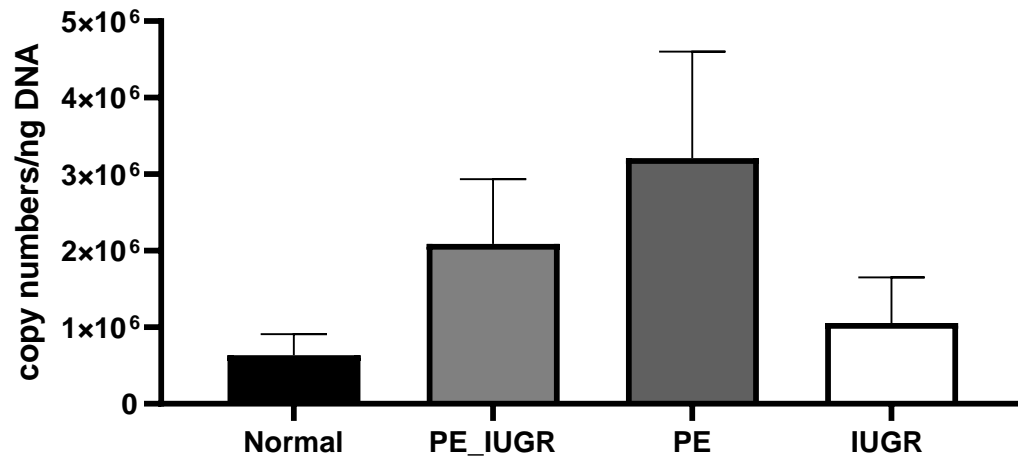

**Supplementary Figure S3.** Absolute quantification of mitochondrial DNA (*mtDNA*) shows no significant difference between cases and controls.

All cases showed elevated mtDNA copy numbers when compared to controls with PE (3211713  $\pm$  2780530 v 634312  $\pm$  1230023; P=0.058); PE IUGR (2089319  $\pm$  2534706 v 634312  $\pm$  1230023; P=0.19) and IUGR (1056158  $\pm$  2144337 v 634312  $\pm$  1230023; P=0.9)

**Supplementary Table S1.** Tata Binding Protein (TBP) Sybr green sequence:

|                      |                          |
|----------------------|--------------------------|
| TBP Forward Sequence | TGTATCCACAGTGAATCTTGGTTG |
| TBP Reverse Sequence | GGTTCGTGGCTCTCTTATCCTC   |
